# Supplementary material
Source: PubMed Central journal article supplement (PMC3374012)
Supplement: NIHMS369829-supplement-01.pdf [file NIHMS369829-supplement-01.pdf]

## **-Supplementary data-**

# Merocyclophanes A and B, Antiproliferative Cyclophanes from the Cultured Terrestrial Cyanobacterium *Nostoc* sp.

Hahk-Soo Kang <sup>a</sup>, Bernard D. Santarsiero <sup>b</sup>, Hyunjung Kim <sup>a</sup>, Aleksej Krunic <sup>a</sup>, Qi Shen <sup>a</sup>, Steven M. Swanson <sup>a</sup>, Hee-Byung Chai <sup>c</sup>, A. Douglas Kinghorn <sup>c</sup>, Jimmy Orjala<sup>a,\*</sup>

<sup>a</sup> Department of Medicinal Chemistry and Pharmacognosy, College of Pharmacy, University of Illinois at Chicago, Chicago, Illinois 60612, USA

<sup>b</sup> Center for Pharmaceutical Biotechnology, University of Illinois at Chicago, Chicago, Illinois 60612, USA

<sup>c</sup> Division of Medicinal Chemistry and Pharmacognosy, College of Pharmacy, The Ohio State University, Columbus, OH 43210, USA

Adress for correspondence:

Jimmy Orjala, Department of Medicinal Chemistry and Pharmacognosy, College of Pharmacy, 833 South Wood Street, University of Illinois at Chicago, Chicago, IL 60612, USA

(M/C781)

Tel: 312-996-5583, Fax: 312-996-7107, E-mail: orjala@uic.edu

## Table of Contents

- S1. Morphological description of the strain UIC 10062
- S2. X-ray crystallographic data of **1**
- S3.  $^1\text{H}$  NMR spectrum (600 MHz, MeOH- $d_4$ ) of **1**
- S4. COSY spectrum (600 MHz, MeOH- $d_4$ ) of **1**
- S5. HSQC spectrum (600 MHz, MeOH- $d_4$ ) of **1**
- S6. HMBC spectrum (600 MHz, MeOH- $d_4$ ) of **1**
- S7.  $^1\text{H}$  NMR spectrum (600 MHz, DMSO- $d_6$ ) of **2**
- S8. COSY spectrum (600 MHz, DMSO- $d_6$ ) of **2**
- S9. HSQC spectrum (600 MHz, DMSO- $d_6$ ) of **2**
- S10. HMBC spectrum (600 MHz, DMSO- $d_6$ ) of **2**
- S11. CD spectra of **1** and **2**
- S12. Torsion energy profile of the hydroxyquinone ring in **2**

## S1. Morphological description of the strain UIC 10062

### **Photomicrograph (400x, bright field) of *Nostoc* sp. UIC10062**

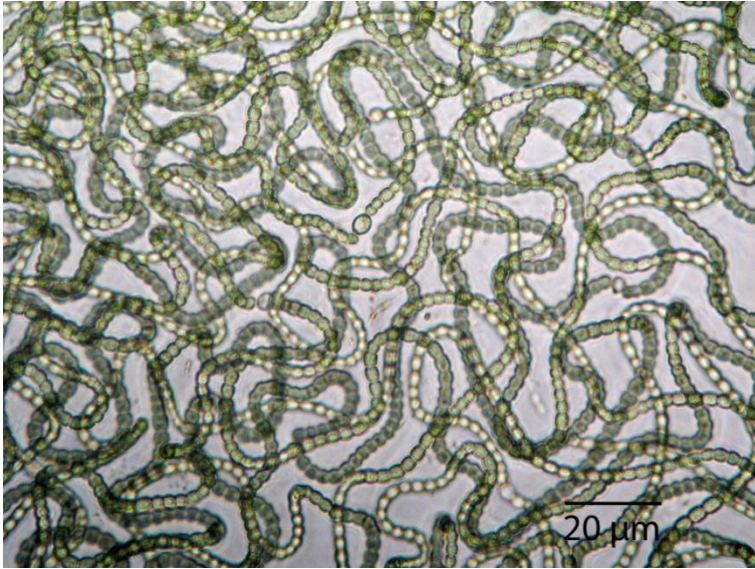

### **Morphological description of *Nostoc* sp. UIC10062**

The thalli occurred as macroscopic, irregular mats in clusters. The filaments were isopolar with solitary, intercalary heterocysts, intermittent akinetes, and cylindrical with cells organized in trichomes. The trichomes were long, straight or irregularly waved, and covered with a thin, barely visible, mucilage sheath. The cells were barrel-shaped with a cell length (2-3 μm) to width (1.5-2 μm). Constrictions at the cell cross-walls were observed in which cells were divided perpendicularly to the trichome axis.

S2. X-ray crystallographic data of 1

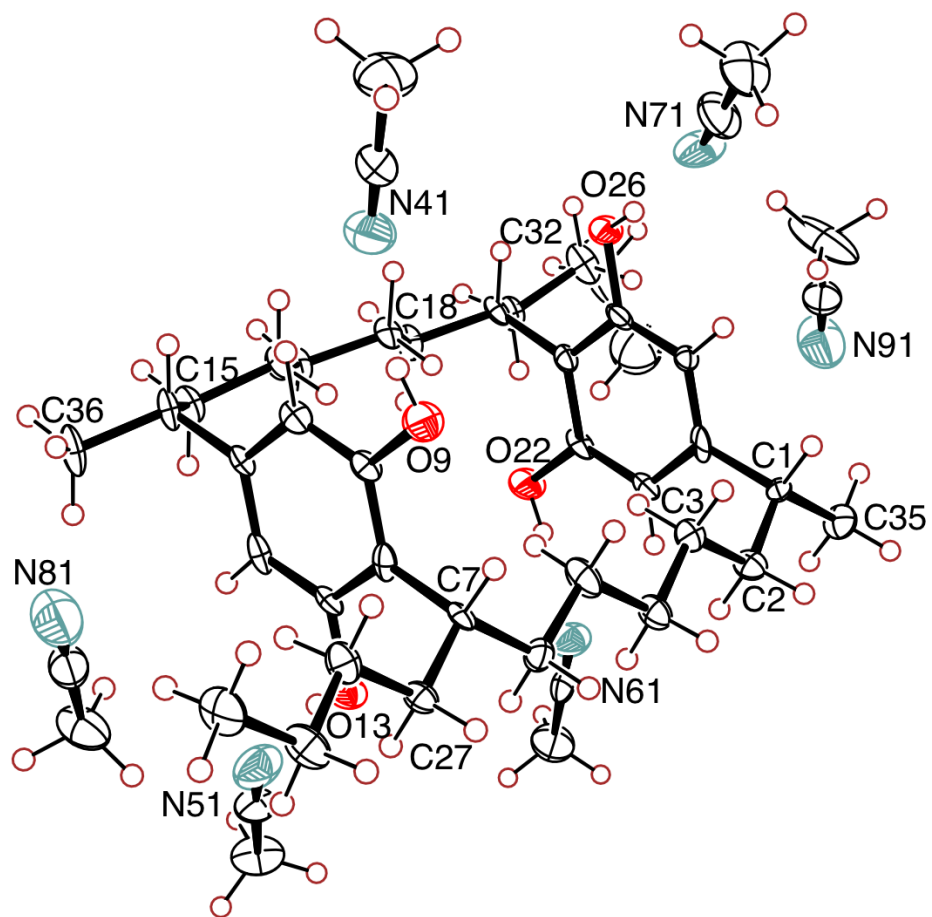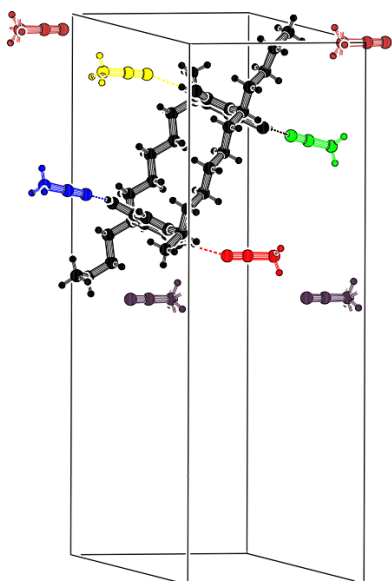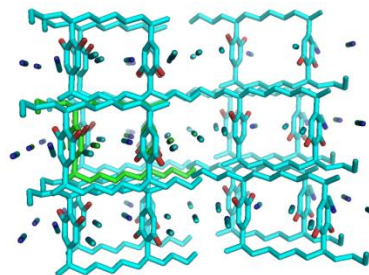

### Crystal data and structure refinement for JOMac.

|                                        |                                                                    |
|----------------------------------------|--------------------------------------------------------------------|
| Empirical formula                      | $C_{36}H_{56}O_4 \cdot 5CH_3CN$                                    |
| Formula weight                         | 758.10                                                             |
| Temperature                            | 100(1) K                                                           |
| Wavelength                             | 0.800 Å                                                            |
| Crystal system, space group            | Monoclinic, C2 (No. 5)                                             |
|                                        | $a = 14.735(2)$ Å                                                  |
| Unit cell dimensions                   | $b = 10.840(5)$ Å $\beta = 95.226(4)^\circ$                        |
|                                        | $c = 29.842(3)$ Å                                                  |
| Volume                                 | $4747(2)$ Å <sup>3</sup>                                           |
| Z, Calculated density                  | 4, 1.061 Mg/m <sup>3</sup>                                         |
| Absorption coefficient                 | $0.057$ mm <sup>-1</sup>                                           |
| F(000)                                 | 1656                                                               |
| Crystal size                           | $0.03 \times 0.03 \times 0.03$ mm                                  |
| Theta range for data collection        | $1.54$ to $27.73^\circ$                                            |
| Limiting indices                       | $-15 \leq h \leq 15$ , $-11 \leq k \leq 11$ , $-32 \leq l \leq 33$ |
| Reflections collected / unique         | 13719 / 5724 [R(int) = 0.0815]                                     |
| Completeness to $\theta = 27.73^\circ$ | 79.2 %                                                             |
| Refinement method                      | Full-matrix least-squares on $F^2$                                 |
| Data / restraints / parameters         | 5724 / 1 / 505                                                     |
| Goodness-of-fit on $F^2$               | 1.072                                                              |
| Final R indices [ $I > 2\sigma(I)$ ]   | R1 = 0.0882, wR2 = 0.2285                                          |
| R indices (all data)                   | R1 = 0.1311, wR2 = 0.2572                                          |
| Absolute structure parameter           | -2(2) [invert 3(2)]                                                |
| Extinction coefficient                 | $0.0145(15)$                                                       |
| Largest diff. peak and hole            | 0.43 and $-0.59$ e Å <sup>-3</sup>                                 |

Atomic coordinates ( $\times 10^4$ ) and equivalent isotropic displacement parameters ( $\text{\AA}^2 \times 10^3$ ) for JOMac.  
 $U(\text{eq})$  is defined as one third of the trace of the Orthogonalized  $U_{ij}$  tensor.

|        | x        | y          | z         | U (eq) |
|--------|----------|------------|-----------|--------|
| C (1)  | 6833 (4) | 1672 (7)   | 6321 (2)  | 17 (2) |
| C (2)  | 7333 (4) | 1700 (7)   | 6795 (2)  | 22 (2) |
| C (3)  | 7060 (4) | 2767 (8)   | 7073 (2)  | 25 (2) |
| C (4)  | 7521 (4) | 2806 (7)   | 7554 (2)  | 25 (2) |
| C (5)  | 7146 (5) | 3845 (8)   | 7825 (2)  | 29 (2) |
| C (6)  | 7538 (4) | 3892 (7)   | 8317 (2)  | 24 (2) |
| C (7)  | 7122 (4) | 4941 (7)   | 8578 (2)  | 16 (2) |
| C (8)  | 6098 (4) | 4888 (7)   | 8570 (2)  | 19 (2) |
| C (9)  | 5555 (4) | 5865 (7)   | 8392 (2)  | 18 (2) |
| O (9)  | 6000 (3) | 6833 (5)   | 8214 (2)  | 35 (1) |
| C (10) | 4615 (4) | 5871 (7)   | 8391 (2)  | 21 (2) |
| C (11) | 4163 (4) | 4891 (7)   | 8571 (2)  | 16 (2) |
| C (12) | 4679 (4) | 3878 (7)   | 8743 (2)  | 23 (2) |
| C (13) | 5623 (4) | 3915 (7)   | 8738 (2)  | 17 (2) |
| O (13) | 6139 (3) | 2928 (5)   | 8909 (1)  | 31 (1) |
| C (14) | 3142 (4) | 4893 (7)   | 8573 (2)  | 24 (2) |
| C (15) | 2691 (4) | 3863 (7)   | 8297 (2)  | 23 (2) |
| C (16) | 2912 (4) | 3861 (7)   | 7806 (2)  | 22 (2) |
| C (17) | 2518 (4) | 2771 (7)   | 7534 (2)  | 21 (2) |
| C (18) | 2826 (4) | 2713 (7)   | 7061 (2)  | 20 (2) |
| C (19) | 2508 (4) | 1575 (7)   | 6799 (2)  | 20 (2) |
| C (20) | 2833 (4) | 1541 (7)   | 6322 (2)  | 17 (2) |
| C (21) | 3876 (4) | 1557 (7)   | 6338 (2)  | 18 (2) |
| C (22) | 4435 (4) | 620 (7)    | 6530 (2)  | 20 (2) |
| O (22) | 3997 (3) | -340 (5)   | 6724 (2)  | 34 (1) |
| C (23) | 5378 (4) | 652 (7)    | 6530 (2)  | 23 (2) |
| C (24) | 5790 (4) | 1624 (8)   | 6336 (2)  | 24 (2) |
| C (25) | 5269 (4) | 2588 (7)   | 6162 (2)  | 15 (2) |
| C (26) | 4328 (4) | 2547 (7)   | 6159 (2)  | 23 (2) |
| O (26) | 3789 (3) | 3487 (5)   | 5970 (1)  | 28 (1) |
| C (27) | 7585 (4) | 5022 (7)   | 9055 (2)  | 21 (2) |
| C (28) | 7256 (4) | 6101 (8)   | 9327 (2)  | 28 (2) |
| C (29) | 7799 (5) | 6272 (8)   | 9787 (2)  | 33 (2) |
| C (30) | 7436 (5) | 7301 (8)   | 10054 (2) | 39 (2) |
| C (31) | 2429 (4) | 451 (7)    | 6046 (2)  | 26 (2) |
| C (32) | 2524 (5) | 579 (8)    | 5540 (2)  | 32 (2) |
| C (33) | 2210 (6) | -558 (11)  | 5260 (2)  | 72 (4) |
| C (34) | 2838 (7) | -1608 (12) | 5321 (3)  | 82 (3) |
| C (35) | 7157 (4) | 590 (7)    | 6039 (2)  | 27 (2) |
| C (36) | 2864 (4) | 4877 (8)   | 9058 (2)  | 36 (2) |
| N (41) | 5050 (5) | 9066 (9)   | 8005 (2)  | 53 (2) |
| C (41) | 5021 (5) | 10066 (10) | 7912 (3)  | 39 (2) |
| C (42) | 4999 (6) | 11390 (9)  | 7801 (3)  | 60 (3) |
| N (51) | 5252 (4) | 738 (9)    | 9173 (2)  | 55 (2) |
| C (51) | 5161 (5) | -279 (9)   | 9196 (3)  | 36 (2) |
| C (52) | 5086 (6) | -1631 (8)  | 9214 (3)  | 47 (2) |
| N (61) | 4992 (4) | -2531 (8)  | 6944 (2)  | 43 (2) |
| C (61) | 4979 (4) | -3566 (10) | 7018 (2)  | 31 (2) |
| C (62) | 4964 (6) | -4862 (9)  | 7113 (3)  | 50 (2) |
| N (71) | 4748 (4) | 5675 (8)   | 5774 (2)  | 49 (2) |
| C (71) | 5043 (6) | 6634 (11)  | 5789 (3)  | 48 (2) |
| C (72) | 5404 (6) | 7875 (8)   | 5801 (3)  | 54 (2) |
| N (81) | 5000     | 6112 (13)  | 10000     | 60 (3) |
| C (81) | 5000     | 5066 (14)  | 10000     | 37 (3) |
| C (82) | 5000     | 3693 (12)  | 10000     | 47 (3) |
| N (91) | 5000     | 23 (13)    | 5000      | 70 (4) |
| C (91) | 5000     | 1042 (15)  | 5000      | 36 (3) |
| C (92) | 5000     | 2342 (13)  | 5000      | 81 (5) |

## Bond lengths [Å] for JOMac.

|                |            |
|----------------|------------|
| C (1) -C (2)   | 1.536 (8)  |
| C (1) -C (24)  | 1.541 (8)  |
| C (1) -C (35)  | 1.545 (9)  |
| C (2) -C (3)   | 1.498 (9)  |
| C (3) -C (4)   | 1.534 (8)  |
| C (4) -C (5)   | 1.518 (10) |
| C (5) -C (6)   | 1.529 (8)  |
| C (6) -C (7)   | 1.537 (9)  |
| C (7) -C (8)   | 1.508 (8)  |
| C (7) -C (27)  | 1.524 (7)  |
| C (8) -C (13)  | 1.383 (9)  |
| C (8) -C (9)   | 1.403 (9)  |
| C (9) -O (9)   | 1.370 (8)  |
| C (9) -C (10)  | 1.384 (8)  |
| C (10) -C (11) | 1.387 (9)  |
| C (11) -C (12) | 1.406 (9)  |
| C (11) -C (14) | 1.506 (8)  |
| C (12) -C (13) | 1.393 (8)  |
| C (13) -O (13) | 1.383 (8)  |
| C (14) -C (15) | 1.505 (9)  |
| C (14) -C (36) | 1.539 (7)  |
| C (15) -C (16) | 1.530 (7)  |
| C (16) -C (17) | 1.519 (9)  |
| C (17) -C (18) | 1.522 (7)  |
| C (18) -C (19) | 1.510 (9)  |
| C (19) -C (20) | 1.545 (7)  |
| C (20) -C (31) | 1.529 (9)  |
| C (20) -C (21) | 1.533 (8)  |
| C (21) -C (26) | 1.395 (10) |
| C (21) -C (22) | 1.397 (9)  |
| C (22) -O (22) | 1.379 (8)  |
| C (22) -C (23) | 1.390 (9)  |
| C (23) -C (24) | 1.371 (10) |
| C (24) -C (25) | 1.371 (10) |
| C (25) -C (26) | 1.386 (8)  |
| C (26) -O (26) | 1.381 (8)  |
| C (27) -C (28) | 1.527 (9)  |
| C (28) -C (29) | 1.538 (8)  |
| C (29) -C (30) | 1.498 (10) |
| C (31) -C (32) | 1.535 (8)  |
| C (32) -C (33) | 1.537 (12) |
| C (33) -C (34) | 1.467 (15) |
| N (41) -C (41) | 1.120 (11) |
| C (41) -C (42) | 1.472 (13) |
| N (51) -C (51) | 1.114 (11) |
| C (51) -C (52) | 1.471 (12) |
| N (61) -C (61) | 1.144 (11) |
| C (61) -C (62) | 1.434 (13) |
| N (71) -C (71) | 1.126 (12) |
| C (71) -C (72) | 1.445 (14) |
| N (81) -C (81) | 1.134 (16) |
| C (81) -C (82) | 1.488 (18) |
| N (91) -C (91) | 1.105 (16) |
| C (91) -C (92) | 1.409 (18) |

## Bond angles [°] for JOMac.

|                   |           |
|-------------------|-----------|
| C(2)-C(1)-C(24)   | 111.7(4)  |
| C(2)-C(1)-C(35)   | 111.7(5)  |
| C(24)-C(1)-C(35)  | 110.4(6)  |
| C(3)-C(2)-C(1)    | 113.2(5)  |
| C(2)-C(3)-C(4)    | 114.9(6)  |
| C(5)-C(4)-C(3)    | 111.5(6)  |
| C(4)-C(5)-C(6)    | 114.2(6)  |
| C(5)-C(6)-C(7)    | 112.2(5)  |
| C(8)-C(7)-C(27)   | 112.2(4)  |
| C(8)-C(7)-C(6)    | 114.2(5)  |
| C(27)-C(7)-C(6)   | 110.5(5)  |
| C(13)-C(8)-C(9)   | 115.0(6)  |
| C(13)-C(8)-C(7)   | 124.2(6)  |
| C(9)-C(8)-C(7)    | 120.8(6)  |
| O(9)-C(9)-C(10)   | 120.7(6)  |
| O(9)-C(9)-C(8)    | 116.6(5)  |
| C(10)-C(9)-C(8)   | 122.7(6)  |
| C(9)-C(10)-C(11)  | 120.7(7)  |
| C(10)-C(11)-C(12) | 118.5(6)  |
| C(10)-C(11)-C(14) | 121.1(6)  |
| C(12)-C(11)-C(14) | 120.4(6)  |
| C(13)-C(12)-C(11) | 118.8(6)  |
| O(13)-C(13)-C(8)  | 116.3(5)  |
| O(13)-C(13)-C(12) | 119.4(6)  |
| C(8)-C(13)-C(12)  | 124.3(7)  |
| C(15)-C(14)-C(11) | 112.8(6)  |
| C(15)-C(14)-C(36) | 111.3(5)  |
| C(11)-C(14)-C(36) | 110.9(5)  |
| C(14)-C(15)-C(16) | 113.8(5)  |
| C(17)-C(16)-C(15) | 114.2(5)  |
| C(16)-C(17)-C(18) | 113.4(5)  |
| C(19)-C(18)-C(17) | 114.1(5)  |
| C(18)-C(19)-C(20) | 112.9(5)  |
| C(31)-C(20)-C(21) | 111.5(5)  |
| C(31)-C(20)-C(19) | 112.1(5)  |
| C(21)-C(20)-C(19) | 111.3(5)  |
| C(26)-C(21)-C(22) | 115.6(6)  |
| C(26)-C(21)-C(20) | 120.6(6)  |
| C(22)-C(21)-C(20) | 123.9(6)  |
| O(22)-C(22)-C(23) | 121.6(6)  |
| O(22)-C(22)-C(21) | 116.1(6)  |
| C(23)-C(22)-C(21) | 122.3(6)  |
| C(24)-C(23)-C(22) | 120.1(7)  |
| C(25)-C(24)-C(23) | 119.4(6)  |
| C(25)-C(24)-C(1)  | 119.3(7)  |
| C(23)-C(24)-C(1)  | 121.3(7)  |
| C(24)-C(25)-C(26) | 120.2(6)  |
| O(26)-C(26)-C(25) | 121.1(6)  |
| O(26)-C(26)-C(21) | 116.6(5)  |
| C(25)-C(26)-C(21) | 122.3(6)  |
| C(7)-C(27)-C(28)  | 113.8(5)  |
| C(27)-C(28)-C(29) | 113.7(6)  |
| C(30)-C(29)-C(28) | 112.6(6)  |
| C(20)-C(31)-C(32) | 113.1(6)  |
| C(31)-C(32)-C(33) | 114.4(7)  |
| C(34)-C(33)-C(32) | 113.5(8)  |
| N(41)-C(41)-C(42) | 178.4(10) |
| N(51)-C(51)-C(52) | 177.0(9)  |
| N(61)-C(61)-C(62) | 179.7(10) |
| N(71)-C(71)-C(72) | 178.6(11) |
| N(81)-C(81)-C(82) | 180.000   |
| N(91)-C(91)-C(92) | 180.000   |



Anisotropic displacement parameters ( $\text{\AA}^2 \times 10^3$ ) for JOMac. The anisotropic displacement factor exponent takes the form:  $-2\pi^2[h^2a^2U11 + \dots + 2hka*b*U12]$

|        | U11      | U22     | U33    | U23     | U13    | U12     |
|--------|----------|---------|--------|---------|--------|---------|
| C (1)  | 20 (4)   | 11 (4)  | 20 (3) | 2 (3)   | 7 (2)  | 7 (3)   |
| C (2)  | 29 (4)   | 15 (5)  | 23 (3) | 0 (3)   | 2 (2)  | 0 (3)   |
| C (3)  | 27 (4)   | 30 (5)  | 19 (3) | 0 (3)   | 4 (2)  | 3 (3)   |
| C (4)  | 35 (4)   | 22 (5)  | 17 (3) | -3 (3)  | 3 (3)  | -1 (3)  |
| C (5)  | 47 (4)   | 27 (5)  | 14 (3) | -4 (3)  | 4 (3)  | -3 (4)  |
| C (6)  | 21 (4)   | 32 (5)  | 19 (3) | -3 (3)  | 2 (2)  | 6 (3)   |
| C (7)  | 30 (4)   | 6 (4)   | 12 (3) | 3 (3)   | 6 (2)  | 0 (3)   |
| C (8)  | 16 (3)   | 30 (5)  | 11 (3) | -9 (3)  | 3 (2)  | -7 (3)  |
| C (9)  | 22 (4)   | 12 (5)  | 20 (3) | 4 (3)   | 4 (2)  | -6 (3)  |
| O (9)  | 29 (3)   | 32 (4)  | 45 (3) | 12 (3)  | 8 (2)  | -3 (2)  |
| C (10) | 35 (4)   | 8 (5)   | 19 (3) | -3 (3)  | 6 (3)  | -1 (3)  |
| C (11) | 20 (3)   | 18 (5)  | 11 (3) | 2 (3)   | 3 (2)  | -5 (3)  |
| C (12) | 28 (4)   | 30 (6)  | 13 (3) | -4 (3)  | 9 (2)  | -11 (4) |
| C (13) | 27 (4)   | 14 (5)  | 10 (3) | 3 (3)   | 4 (2)  | -3 (3)  |
| O (13) | 30 (3)   | 27 (4)  | 35 (2) | 12 (3)  | 2 (2)  | -4 (2)  |
| C (14) | 29 (4)   | 29 (5)  | 14 (3) | -6 (3)  | 11 (2) | -9 (4)  |
| C (15) | 29 (4)   | 19 (5)  | 20 (3) | -2 (3)  | 6 (2)  | -11 (3) |
| C (16) | 30 (4)   | 20 (5)  | 16 (3) | -4 (3)  | 7 (2)  | -2 (3)  |
| C (17) | 32 (4)   | 12 (5)  | 21 (3) | -3 (3)  | 12 (3) | -5 (3)  |
| C (18) | 32 (4)   | 7 (5)   | 23 (3) | 2 (3)   | 10 (3) | -5 (3)  |
| C (19) | 31 (3)   | 7 (4)   | 22 (3) | -7 (3)  | 10 (2) | -9 (3)  |
| C (20) | 31 (4)   | 10 (5)  | 12 (3) | 0 (3)   | 6 (2)  | -5 (3)  |
| C (21) | 23 (4)   | 18 (5)  | 13 (3) | 0 (3)   | 5 (2)  | 0 (3)   |
| C (22) | 39 (4)   | 5 (4)   | 18 (3) | 2 (3)   | 10 (3) | -4 (3)  |
| O (22) | 35 (3)   | 24 (4)  | 44 (3) | 17 (3)  | 8 (2)  | -2 (3)  |
| C (23) | 26 (4)   | 28 (5)  | 14 (3) | 8 (3)   | 4 (2)  | 0 (4)   |
| C (24) | 25 (4)   | 41 (6)  | 7 (3)  | -7 (3)  | 7 (2)  | -2 (4)  |
| C (25) | 18 (4)   | 12 (5)  | 16 (3) | 1 (3)   | 4 (2)  | 0 (3)   |
| C (26) | 34 (4)   | 23 (5)  | 13 (3) | 7 (3)   | 7 (2)  | 5 (4)   |
| O (26) | 28 (2)   | 17 (4)  | 39 (2) | 11 (2)  | 8 (2)  | 1 (2)   |
| C (27) | 27 (4)   | 16 (5)  | 19 (3) | 3 (3)   | 2 (2)  | -2 (3)  |
| C (28) | 33 (4)   | 31 (6)  | 19 (3) | -4 (3)  | 4 (3)  | -3 (4)  |
| C (29) | 44 (4)   | 32 (6)  | 20 (3) | -3 (4)  | -3 (3) | -9 (4)  |
| C (30) | 63 (5)   | 34 (6)  | 21 (3) | -12 (4) | 2 (3)  | 8 (4)   |
| C (31) | 29 (4)   | 29 (5)  | 20 (3) | -3 (3)  | 6 (3)  | -4 (3)  |
| C (32) | 43 (4)   | 32 (6)  | 22 (3) | -3 (4)  | 5 (3)  | -17 (4) |
| C (33) | 88 (7)   | 97 (10) | 32 (4) | -18 (5) | 15 (4) | -60 (7) |
| C (35) | 32 (4)   | 23 (5)  | 26 (3) | -8 (3)  | 4 (3)  | 5 (3)   |
| C (36) | 43 (4)   | 50 (7)  | 17 (3) | -11 (4) | 16 (3) | -10 (4) |
| N (41) | 48 (4)   | 57 (7)  | 56 (4) | 23 (5)  | 7 (3)  | 6 (5)   |
| C (41) | 43 (5)   | 39 (7)  | 37 (4) | 11 (4)  | 11 (3) | 4 (5)   |
| C (42) | 82 (7)   | 33 (7)  | 66 (5) | 11 (5)  | 9 (5)  | 13 (5)  |
| N (51) | 32 (4)   | 52 (7)  | 81 (5) | 18 (5)  | 9 (3)  | 2 (4)   |
| C (51) | 33 (4)   | 21 (6)  | 54 (5) | 18 (4)  | 7 (3)  | -1 (4)  |
| C (52) | 67 (5)   | 6 (5)   | 68 (5) | 9 (4)   | 3 (4)  | 5 (4)   |
| N (61) | 35 (4)   | 33 (6)  | 60 (4) | 15 (4)  | 5 (3)  | 2 (4)   |
| C (61) | 17 (4)   | 45 (7)  | 32 (4) | 4 (4)   | 10 (3) | 0 (4)   |
| C (62) | 60 (5)   | 33 (7)  | 57 (5) | 14 (5)  | 9 (4)  | 1 (5)   |
| N (71) | 42 (4)   | 18 (5)  | 87 (5) | 16 (4)  | 6 (3)  | 1 (4)   |
| C (71) | 42 (5)   | 55 (8)  | 47 (5) | 17 (5)  | 7 (4)  | -14 (5) |
| C (72) | 67 (6)   | 29 (6)  | 68 (5) | 3 (5)   | 20 (4) | -18 (5) |
| N (81) | 76 (8)   | 54 (10) | 50 (6) | 0       | 15 (5) | 0       |
| C (81) | 37 (6)   | 42 (11) | 31 (6) | 0       | 6 (4)  | 0       |
| C (82) | 76 (8)   | 31 (10) | 32 (6) | 0       | -3 (5) | 0       |
| N (91) | 98 (9)   | 45 (10) | 70 (7) | 0       | 29 (6) | 0       |
| C (91) | 36 (6)   | 40 (10) | 31 (6) | 0       | -3 (4) | 0       |
| C (92) | 198 (16) | 14 (9)  | 29 (6) | 0       | 6 (8)  | 0       |

Hydrogen coordinates ( $\times 10^4$ ) and isotropic displacement parameters ( $\text{\AA}^2 \times 10^3$ ) for JOMac.

|         | x    | y     | z     | U (eq) |
|---------|------|-------|-------|--------|
| H (1)   | 6981 | 2455  | 6166  | 20     |
| H (2A)  | 7208 | 923   | 6952  | 27     |
| H (2B)  | 7998 | 1742  | 6769  | 27     |
| H (3A)  | 6392 | 2739  | 7087  | 30     |
| H (3B)  | 7204 | 3542  | 6918  | 30     |
| H (4A)  | 7424 | 2010  | 7705  | 30     |
| H (4B)  | 8186 | 2922  | 7545  | 30     |
| H (5A)  | 6476 | 3753  | 7815  | 35     |
| H (5B)  | 7273 | 4640  | 7680  | 35     |
| H (6A)  | 8206 | 4008  | 8329  | 29     |
| H (6B)  | 7421 | 3095  | 8463  | 29     |
| H (7)   | 7269 | 5725  | 8424  | 19     |
| H (9)   | 5647 | 7441  | 8181  | 52     |
| H (10)  | 4276 | 6555  | 8267  | 25     |
| H (12)  | 4389 | 3182  | 8860  | 28     |
| H (13)  | 5793 | 2341  | 8962  | 46     |
| H (14)  | 2915 | 5686  | 8433  | 28     |
| H (15A) | 2022 | 3932  | 8305  | 27     |
| H (15B) | 2883 | 3066  | 8436  | 27     |
| H (16A) | 2677 | 4632  | 7661  | 26     |
| H (16B) | 3583 | 3859  | 7799  | 26     |
| H (17A) | 1844 | 2822  | 7512  | 26     |
| H (17B) | 2700 | 1999  | 7695  | 26     |
| H (18A) | 2595 | 3452  | 6892  | 24     |
| H (18B) | 3500 | 2742  | 7082  | 24     |
| H (19A) | 1834 | 1545  | 6775  | 24     |
| H (19B) | 2739 | 834   | 6967  | 24     |
| H (20)  | 2607 | 2311  | 6164  | 21     |
| H (22)  | 4379 | -885  | 6810  | 51     |
| H (23)  | 5737 | -1    | 6664  | 27     |
| H (25)  | 5553 | 3286  | 6043  | 18     |
| H (26)  | 4115 | 4105  | 5928  | 42     |
| H (27A) | 8251 | 5101  | 9039  | 25     |
| H (27B) | 7474 | 4244  | 9215  | 25     |
| H (28A) | 6606 | 5969  | 9373  | 33     |
| H (28B) | 7298 | 6868  | 9150  | 33     |
| H (29A) | 7780 | 5495  | 9961  | 39     |
| H (29B) | 8444 | 6444  | 9741  | 39     |
| H (30A) | 7801 | 7369  | 10345 | 59     |
| H (30B) | 6800 | 7130  | 10105 | 59     |
| H (30C) | 7470 | 8077  | 9888  | 59     |
| H (31A) | 1775 | 375   | 6093  | 31     |
| H (31B) | 2737 | -316  | 6157  | 31     |
| H (32A) | 3171 | 745   | 5497  | 39     |
| H (32B) | 2164 | 1301  | 5425  | 39     |
| H (33A) | 1603 | -816  | 5343  | 86     |
| H (33B) | 2144 | -326  | 4938  | 86     |
| H (34A) | 2606 | -2294 | 5130  | 124    |
| H (34B) | 2888 | -1867 | 5637  | 124    |
| H (34C) | 3440 | -1363 | 5238  | 124    |
| H (35A) | 7820 | 637   | 6030  | 40     |
| H (35B) | 6860 | 639   | 5732  | 40     |
| H (35C) | 6998 | -194  | 6176  | 40     |
| H (36A) | 2197 | 4881  | 9051  | 54     |
| H (36B) | 3111 | 5607  | 9219  | 54     |
| H (36C) | 3105 | 4131  | 9212  | 54     |
| H (42A) | 5459 | 11825 | 8000  | 90     |
| H (42B) | 4394 | 11724 | 7843  | 90     |
| H (42C) | 5128 | 11501 | 7488  | 90     |
| H (52A) | 5190 | -1908 | 9527  | 71     |
| H (52B) | 5542 | -2004 | 9036  | 71     |
| H (52C) | 4475 | -1883 | 9090  | 71     |
| H (62A) | 4909 | -4987 | 7435  | 75     |
| H (62B) | 5529 | -5242 | 7031  | 75     |
| H (62C) | 4443 | -5243 | 6938  | 75     |
| H (72A) | 5464 | 8158  | 5493  | 81     |
| H (72B) | 6003 | 7884  | 5973  | 81     |
| H (72C) | 4988 | 8424  | 5944  | 81     |
| H (82A) | 5626 | 3391  | 9997  | 70     |
| H (82B) | 4632 | 3391  | 9732  | 70     |
| H (82C) | 4742 | 3391  | 10271 | 70     |
| H (92A) | 4377 | 2643  | 5018  | 121    |
| H (92B) | 5230 | 2643  | 4722  | 121    |
| H (92C) | 5392 | 2643  | 5260  | 121    |

## Torsion angles [deg] for JOMac.

|                                |            |
|--------------------------------|------------|
| C (24) -C (1) -C (2) -C (3)    | -57.9 (8)  |
| C (35) -C (1) -C (2) -C (3)    | 177.8 (6)  |
| C (1) -C (2) -C (3) -C (4)     | 178.1 (6)  |
| C (2) -C (3) -C (4) -C (5)     | -174.9 (6) |
| C (3) -C (4) -C (5) -C (6)     | 176.7 (6)  |
| C (4) -C (5) -C (6) -C (7)     | -178.8 (5) |
| C (5) -C (6) -C (7) -C (8)     | 57.0 (8)   |
| C (5) -C (6) -C (7) -C (27)    | -175.4 (5) |
| C (27) -C (7) -C (8) -C (13)   | -66.2 (8)  |
| C (6) -C (7) -C (8) -C (13)    | 60.5 (7)   |
| C (27) -C (7) -C (8) -C (9)    | 112.9 (6)  |
| C (6) -C (7) -C (8) -C (9)     | -120.4 (6) |
| C (13) -C (8) -C (9) -O (9)    | -178.8 (5) |
| C (7) -C (8) -C (9) -O (9)     | 2.1 (8)    |
| C (13) -C (8) -C (9) -C (10)   | 1.3 (8)    |
| C (7) -C (8) -C (9) -C (10)    | -177.9 (6) |
| O (9) -C (9) -C (10) -C (11)   | 180.0 (5)  |
| C (8) -C (9) -C (10) -C (11)   | -0.1 (9)   |
| C (9) -C (10) -C (11) -C (12)  | -1.5 (8)   |
| C (9) -C (10) -C (11) -C (14)  | 179.8 (5)  |
| C (10) -C (11) -C (12) -C (13) | 1.8 (8)    |
| C (14) -C (11) -C (12) -C (13) | -179.5 (5) |
| C (9) -C (8) -C (13) -O (13)   | 178.8 (5)  |
| C (7) -C (8) -C (13) -O (13)   | -2.0 (8)   |
| C (9) -C (8) -C (13) -C (12)   | -1.0 (8)   |
| C (7) -C (8) -C (13) -C (12)   | 178.2 (5)  |
| C (11) -C (12) -C (13) -O (13) | 179.7 (5)  |
| C (11) -C (12) -C (13) -C (8)  | -0.5 (9)   |
| C (10) -C (11) -C (14) -C (15) | 117.1 (7)  |
| C (12) -C (11) -C (14) -C (15) | -61.6 (7)  |
| C (10) -C (11) -C (14) -C (36) | -117.2 (7) |
| C (12) -C (11) -C (14) -C (36) | 64.1 (8)   |
| C (11) -C (14) -C (15) -C (16) | -56.8 (8)  |
| C (36) -C (14) -C (15) -C (16) | 177.8 (6)  |
| C (14) -C (15) -C (16) -C (17) | 175.7 (6)  |
| C (15) -C (16) -C (17) -C (18) | -174.1 (5) |
| C (16) -C (17) -C (18) -C (19) | 174.8 (6)  |
| C (17) -C (18) -C (19) -C (20) | -179.9 (5) |
| C (18) -C (19) -C (20) -C (31) | -174.4 (6) |
| C (18) -C (19) -C (20) -C (21) | 60.0 (8)   |
| C (31) -C (20) -C (21) -C (26) | 118.2 (6)  |
| C (19) -C (20) -C (21) -C (26) | -115.8 (6) |
| C (31) -C (20) -C (21) -C (22) | -62.3 (7)  |
| C (19) -C (20) -C (21) -C (22) | 63.7 (8)   |
| C (26) -C (21) -C (22) -O (22) | 177.4 (5)  |
| C (20) -C (21) -C (22) -O (22) | -2.1 (9)   |
| C (26) -C (21) -C (22) -C (23) | -2.0 (9)   |
| C (20) -C (21) -C (22) -C (23) | 178.5 (6)  |
| O (22) -C (22) -C (23) -C (24) | -179.6 (6) |
| C (21) -C (22) -C (23) -C (24) | -0.2 (9)   |
| C (22) -C (23) -C (24) -C (25) | 3.1 (9)    |
| C (22) -C (23) -C (24) -C (1)  | -178.6 (5) |
| C (2) -C (1) -C (24) -C (25)   | 116.3 (6)  |
| C (35) -C (1) -C (24) -C (25)  | -118.7 (6) |
| C (2) -C (1) -C (24) -C (23)   | -62.1 (8)  |
| C (35) -C (1) -C (24) -C (23)  | 63.0 (7)   |
| C (23) -C (24) -C (25) -C (26) | -3.6 (9)   |
| C (1) -C (24) -C (25) -C (26)  | 178.0 (5)  |
| C (24) -C (25) -C (26) -O (26) | -177.4 (5) |
| C (24) -C (25) -C (26) -C (21) | 1.3 (9)    |
| C (22) -C (21) -C (26) -O (26) | -179.8 (5) |
| C (20) -C (21) -C (26) -O (26) | -0.2 (8)   |
| C (22) -C (21) -C (26) -C (25) | 1.4 (9)    |
| C (20) -C (21) -C (26) -C (25) | -179.0 (5) |
| C (8) -C (7) -C (27) -C (28)   | -55.4 (8)  |
| C (6) -C (7) -C (27) -C (28)   | 175.9 (5)  |
| C (7) -C (27) -C (28) -C (29)  | -173.3 (6) |
| C (27) -C (28) -C (29) -C (30) | -177.5 (6) |
| C (21) -C (20) -C (31) -C (32) | -69.9 (7)  |
| C (19) -C (20) -C (31) -C (32) | 164.5 (5)  |
| C (20) -C (31) -C (32) -C (33) | 174.2 (7)  |
| C (31) -C (32) -C (33) -C (34) | -73.0 (9)  |

Hydrogen bonds for JOMac [ $\text{\AA}$  and  $^\circ$ ].

---

| D-H...A            | d(D-H) | d(H...A) | d(D...A)  | <(DHA) |
|--------------------|--------|----------|-----------|--------|
| O(1)-H(1)...N(57)  | 0.82   | 2.05     | 2.857(10) | 166    |
| O(2)-H(2A)...N(53) | 0.82   | 2.04     | 2.838(10) | 166    |
| O(3)-H(3)...N(51)  | 0.82   | 2.03     | 2.849(10) | 172    |
| O(4)-H(4A)...N(55) | 0.82   | 2.04     | 2.837(10) | 163    |

S3.  $^1\text{H}$  NMR spectrum (600 MHz,  $\text{MeOH-}d_4$ ) of **1**

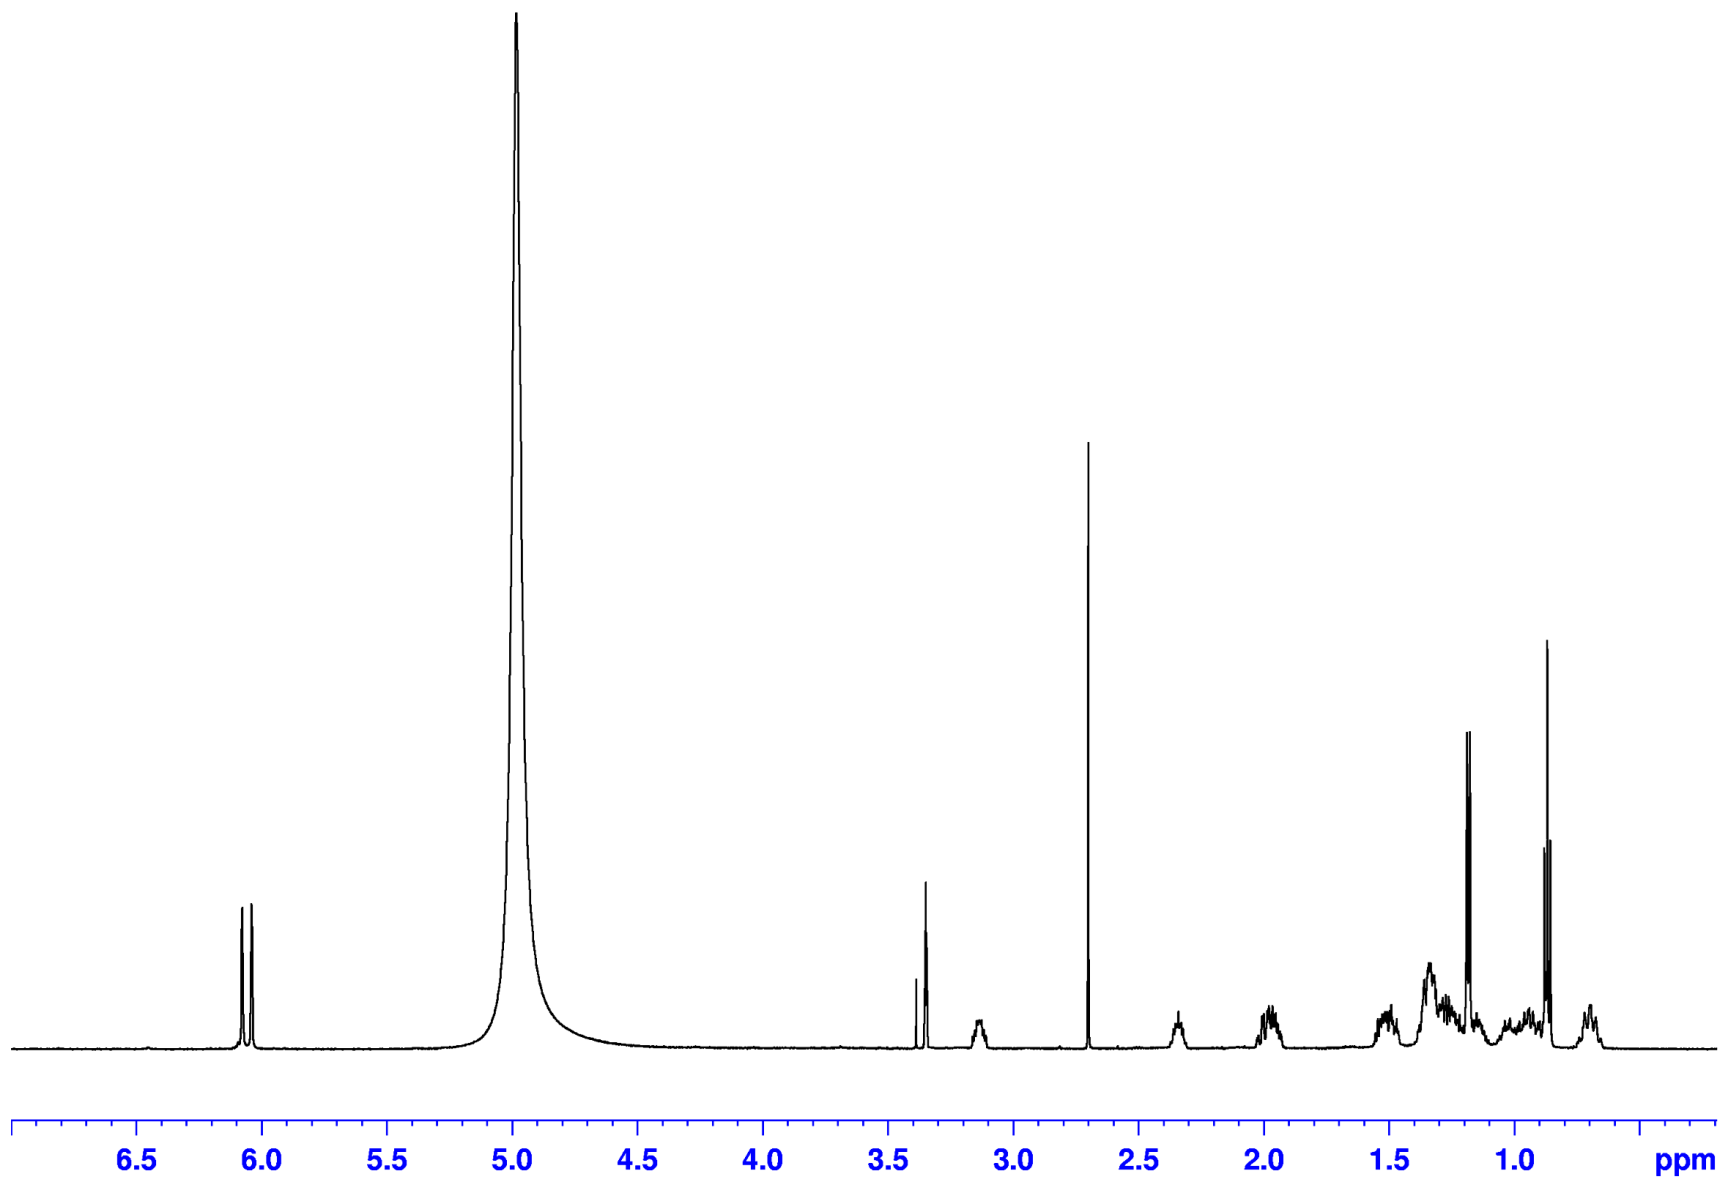

S4. COSY spectrum (600 MHz, MeOH- $d_4$ ) of **1**

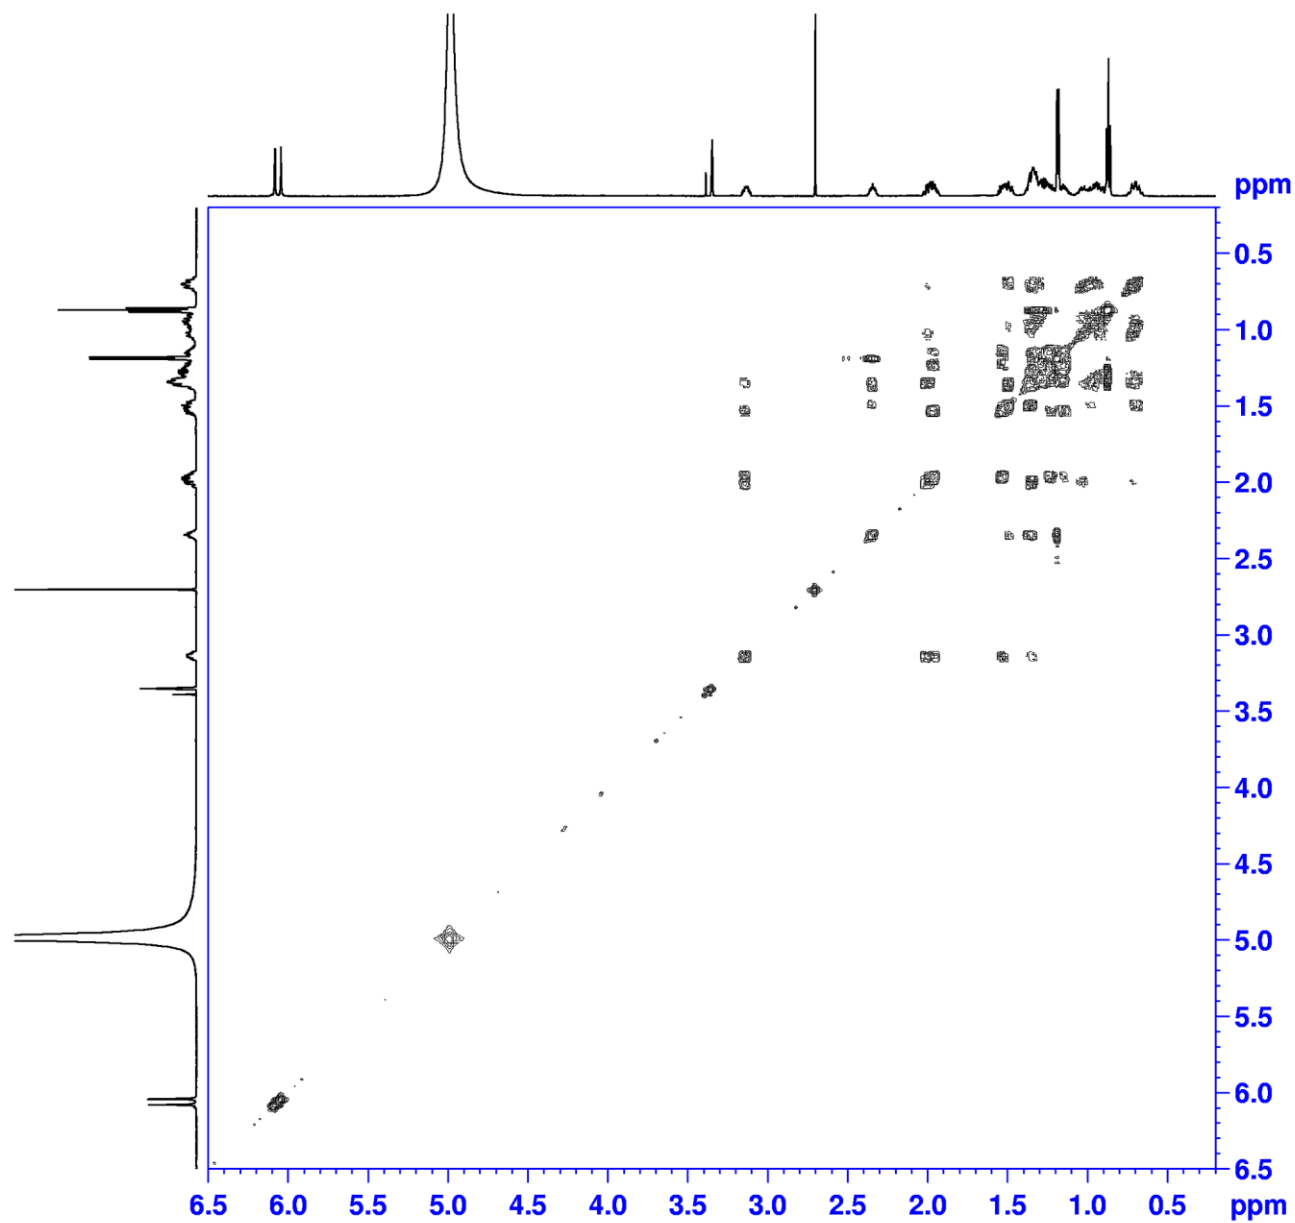

S5. HSQC spectrum (600 MHz, MeOH- $d_4$ ) of **1**

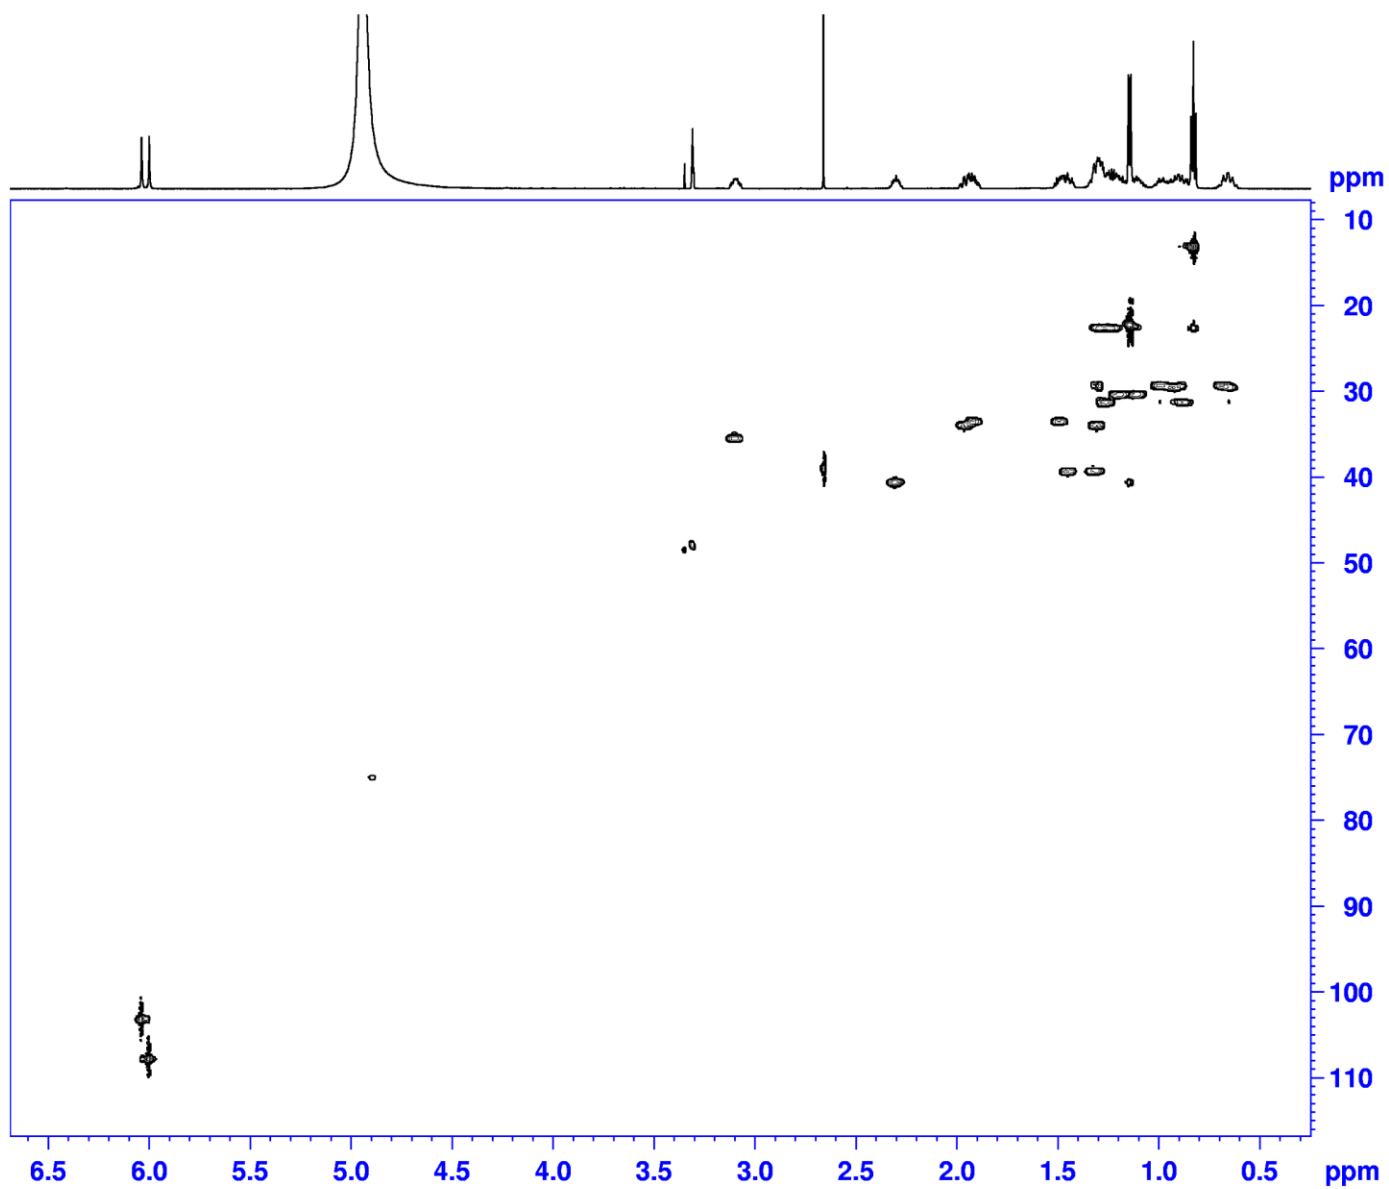

S6. HMBC spectrum (600 MHz, MeOH-*d*<sub>4</sub>) of **1**

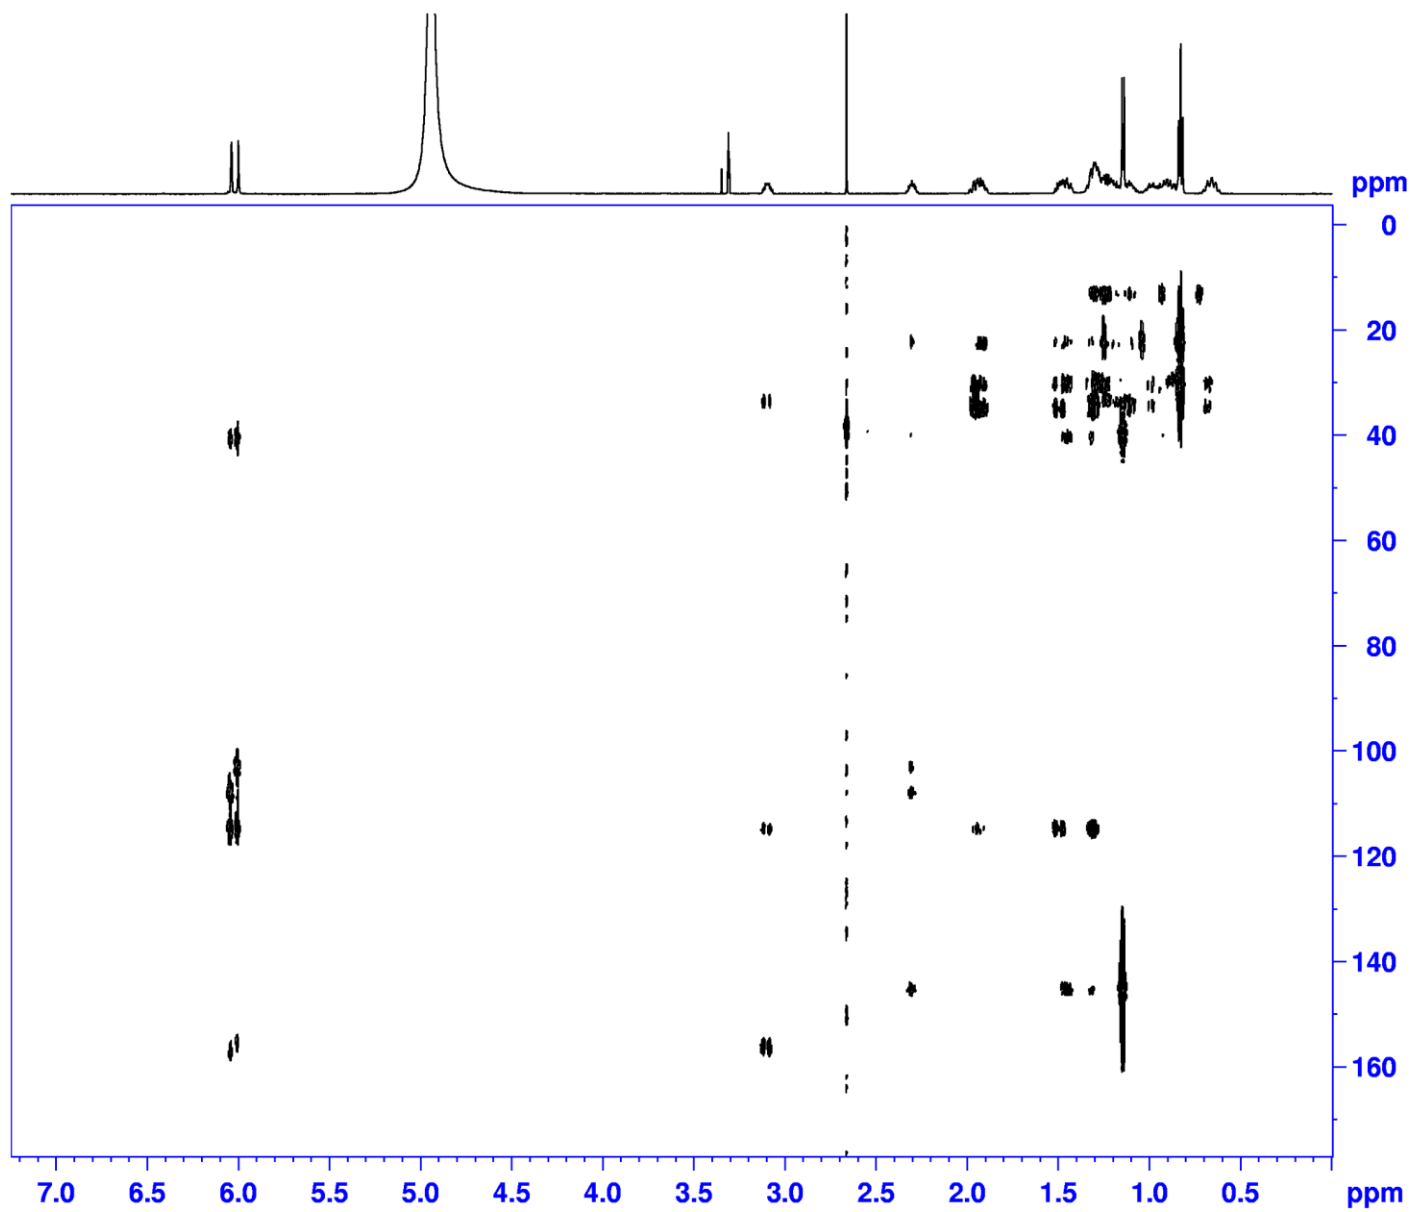



S7.  $^1\text{H}$  NMR spectrum (600 MHz,  $\text{DMSO-}d_6$ ) of **2**

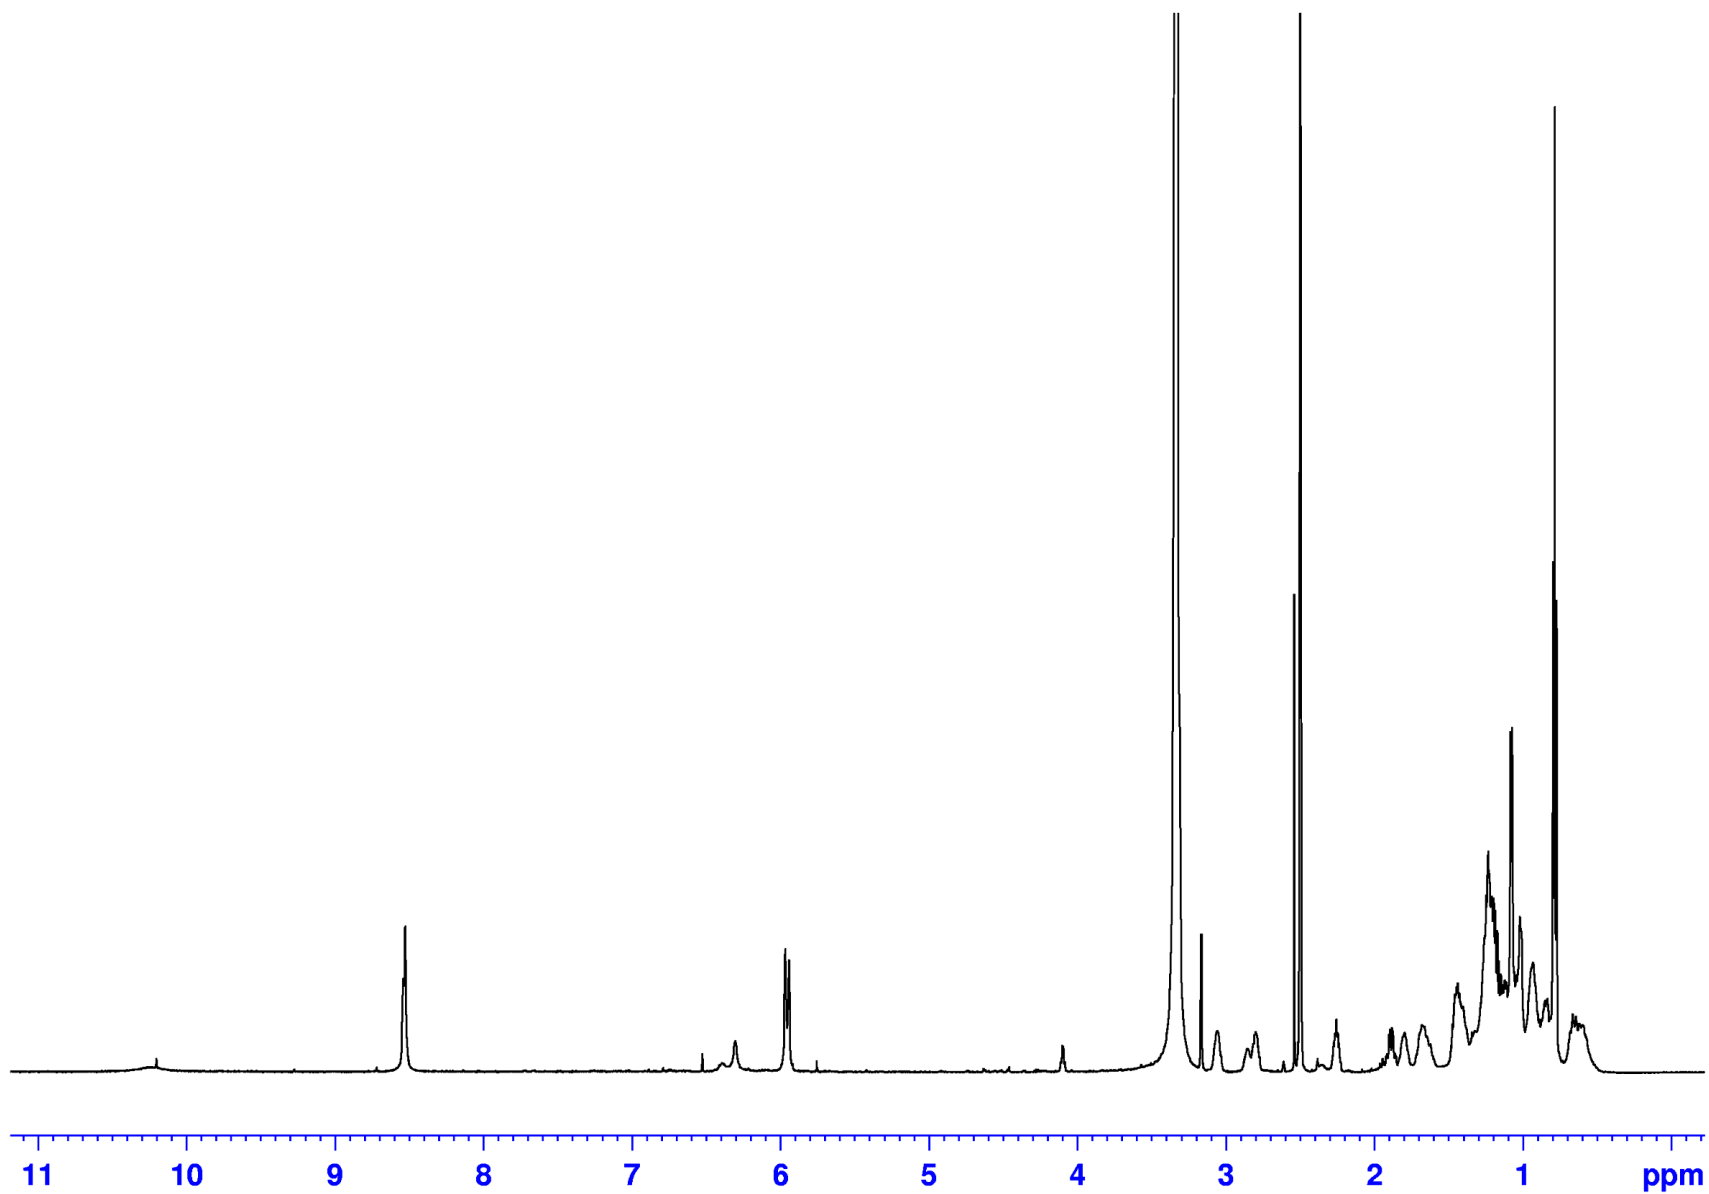

S8. COSY spectrum (600 MHz, DMSO- $d_6$ ) of **2**

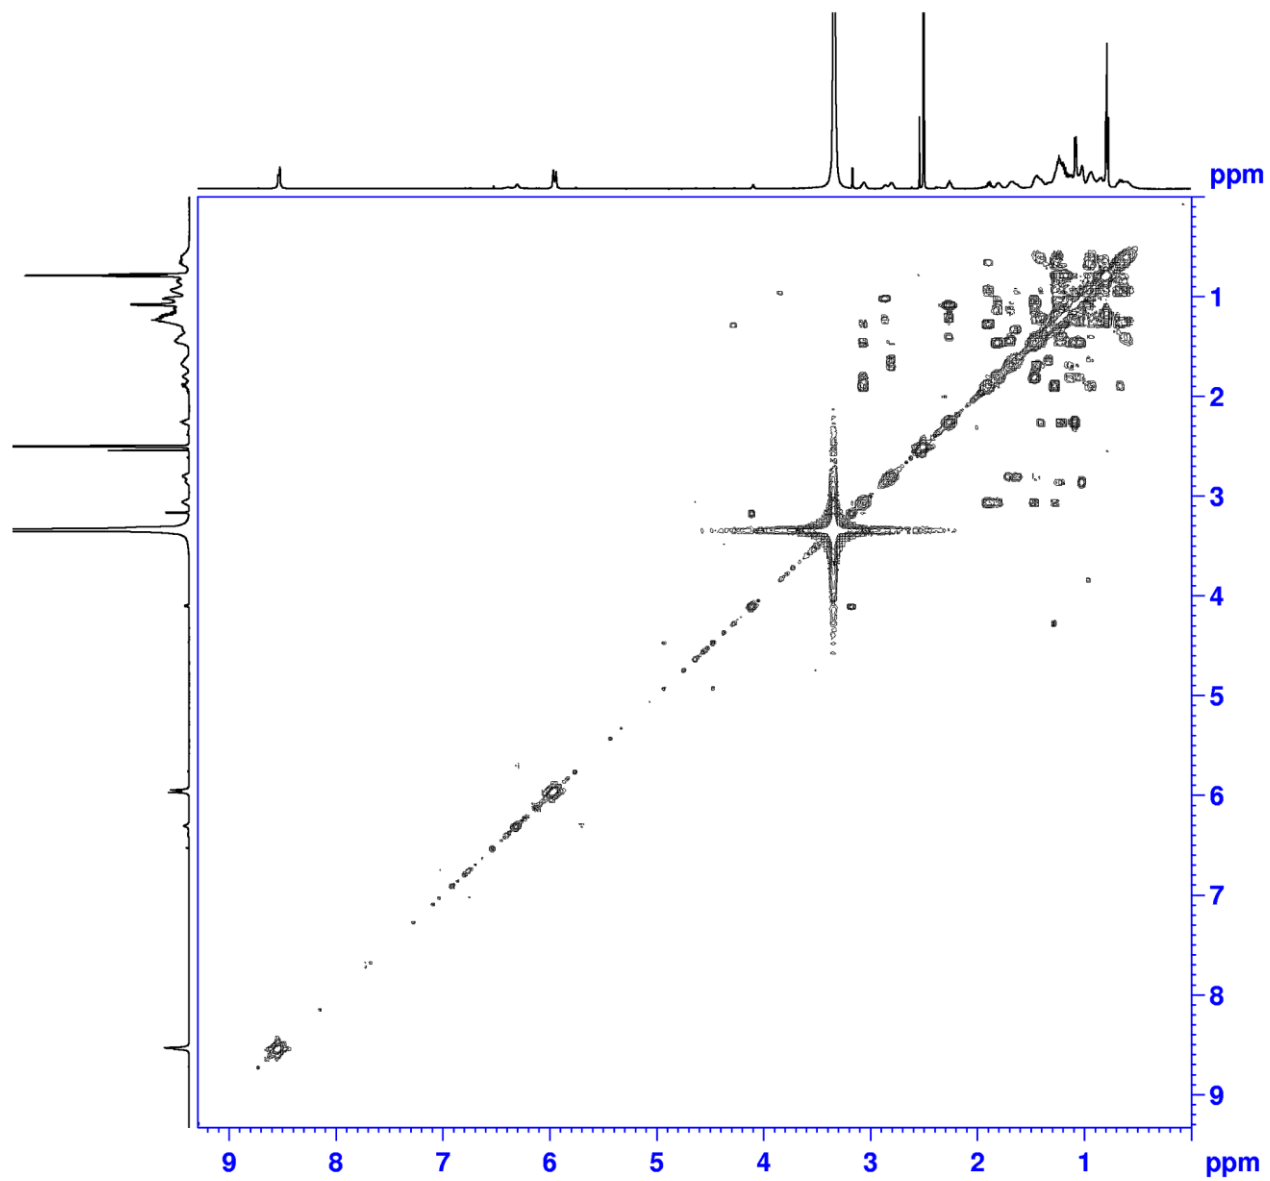

S9. HSQC spectrum (600 MHz, DMSO- $d_6$ ) of **2**

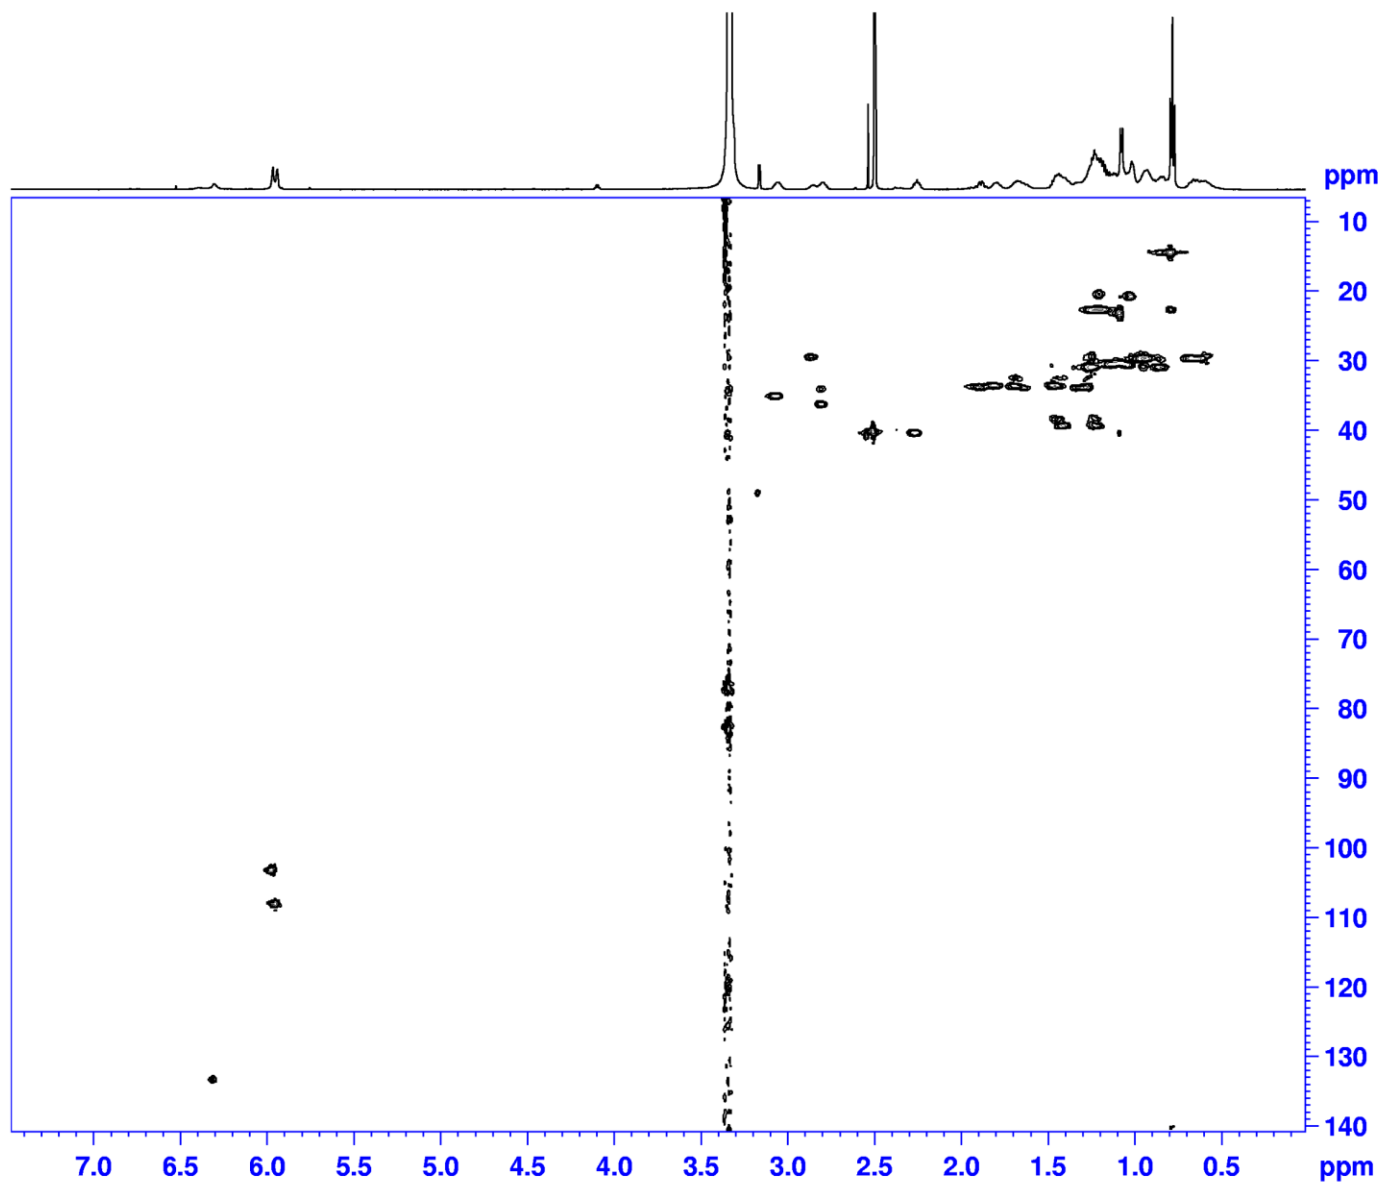

S10. HMBC spectrum (600 MHz, DMSO-*d*<sub>6</sub>) of **2**

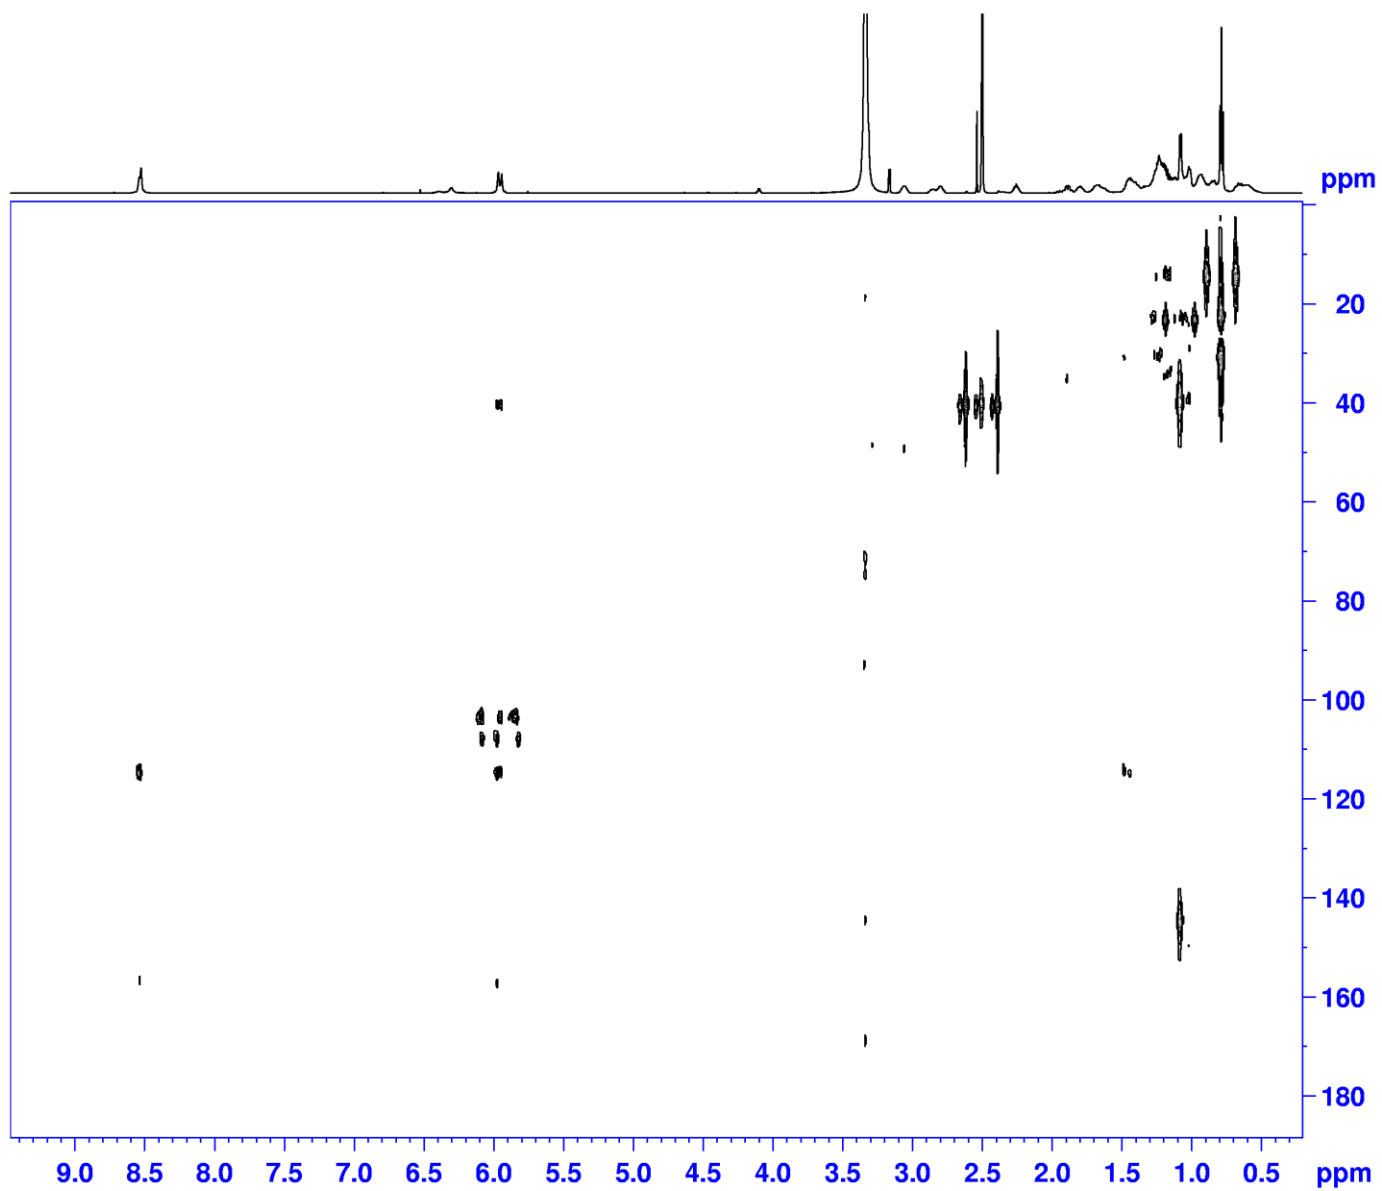

S11. CD spectra of **1** and **2**

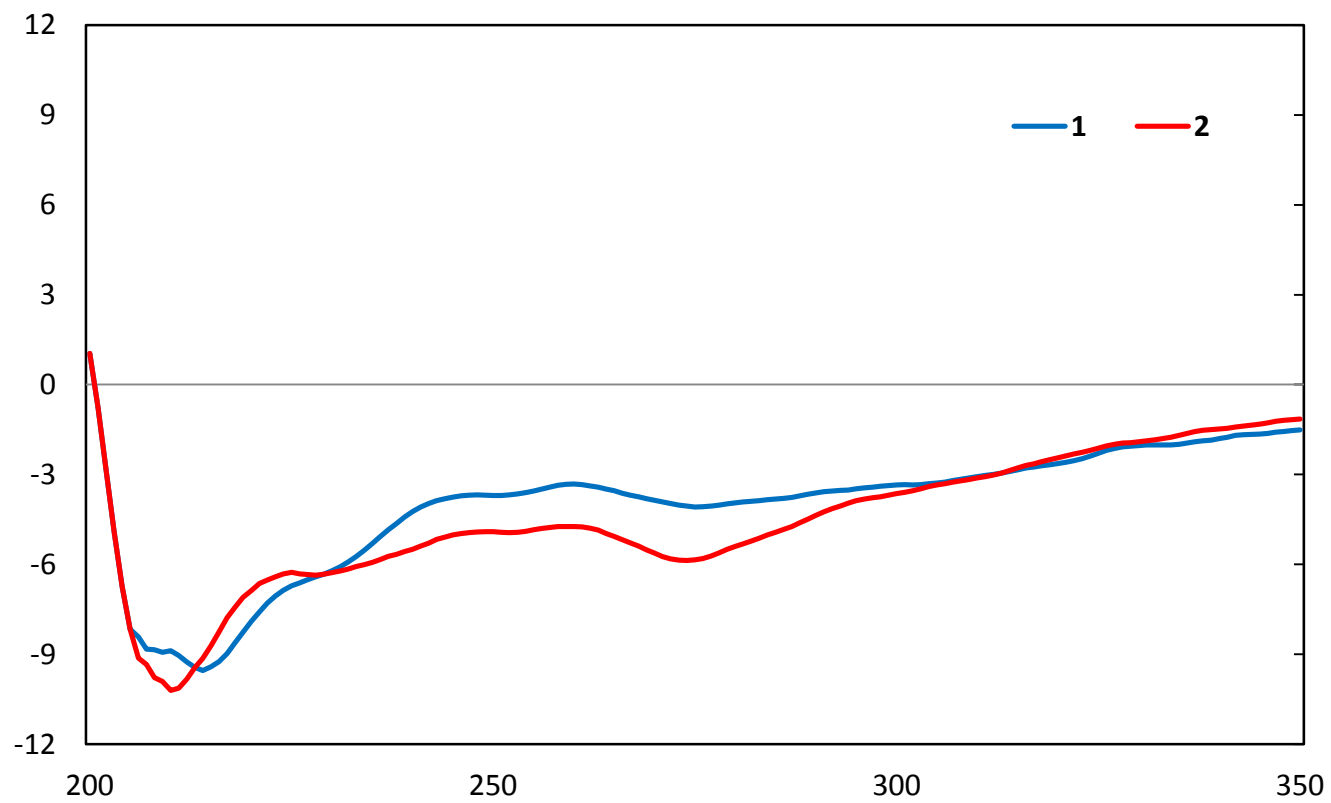

S12. Torsion energy profile of the hydroxyquinone ring in **2**

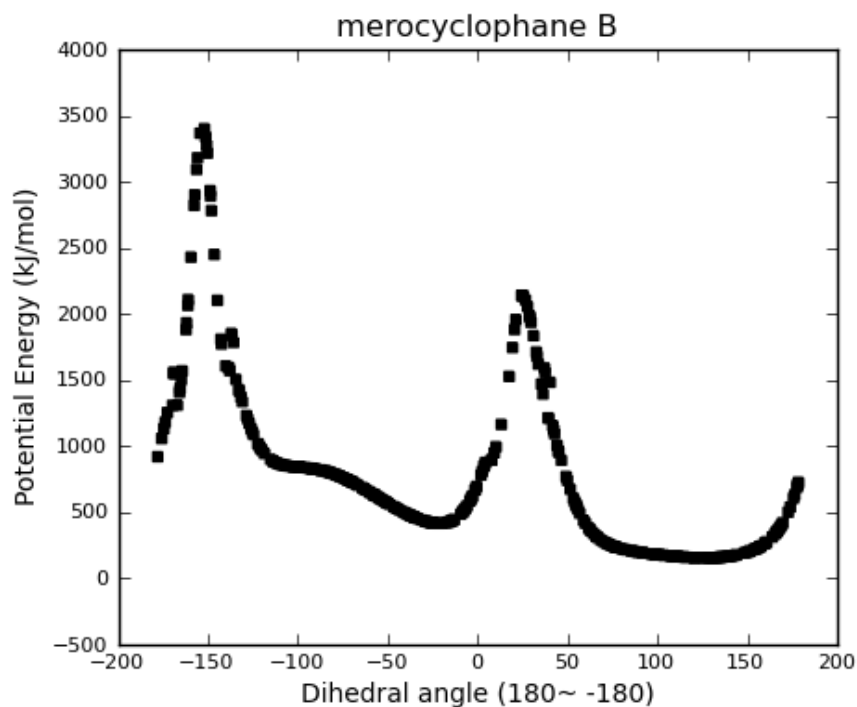

The hydroxyquinone ring was rotated 360 degree with 1 degree increment while freezing the remaining atoms. The total energy was calculated *in vacuo* at each degree increment using Maestro 9.2 with the MM3 force field.

- Maestro, version 9.2, Schrödinger, LLC, New York, NY, 2011.
- Norman L. Allinger; Young H. Yuh; Jenn Huei Lii *J. Am. Chem. Soc.*, 1989, 111 (23), pp 8551–8566 **DOI:** 10.1021/ja00205a001
